# Supplementary material
Source: MDPI journal article supplement (https://www.mdpi.com/2673-3897/3/4/25)
Supplement: s1 [file s1]

## Supplementary file S1:

**Feature importance scores for all 72 features, averaged across the ten best results in hyper-tuning (see Supplementary file S2).**

Overall importance 37

weeks

id

|            |                                                         |
|------------|---------------------------------------------------------|
| 0.98758041 | S1 DV OECD equivalised income                           |
| 0.85605563 | Partners age at birth of CM                             |
| 0.84432157 | S1 PART Life satisfaction                               |
| 0.84258112 | S1 MAIN Date of Birth (year)                            |
| 0.83486034 | S1 MAIN SOC2000 (without dots)                          |
| 0.8228174  | S1 PART Happy/Unhappy with relationship                 |
| 0.821527   | S1 PART Highest academic qualification                  |
| 0.82035027 | S1 PART Age left full-time education                    |
| 0.75936859 | age left ft education                                   |
| 0.73881838 | S1 MAIN Life satisfaction                               |
| 0.71871111 | S1 PART General Health                                  |
| 0.70087589 | S1 MAIN Happy/Unhappy with relationship                 |
| 0.69440132 | S1 PART Control over life                               |
| 0.69067715 | S1 DV Number of siblings of CM in household             |
| 0.68306262 | S1 MAIN Pollution, grime, environmental problems        |
| 0.68294946 | S1 MAIN Vandalism and damage to property                |
| 0.67409882 | S1 MAIN Satisfaction with area                          |
| 0.65324506 | S1 PART Longstanding Illness                            |
| 0.63092511 | S1 PART Can run own life                                |
| 0.61418684 | S1 PART Suspects on brink of separation                 |
| 0.60113396 | S1 HHQ Cohort Member Sex C1                             |
| 0.58678548 | preg_bleeding                                           |
| 0.58512601 | S1 PART Partner ever used force                         |
| 0.58143152 | S1 PART Depression                                      |
| 0.57925801 | MC_IBI_1                                                |
| 0.56637042 | S1 MAIN Depression                                      |
| 0.55518964 | S1 MAIN Control over life                               |
| 0.55130603 | S1 MAIN Gets what wants out of life                     |
| 0.54644137 | S1 MAIN Suspects on brink of separation                 |
| 0.52858487 | S1 PART Paid job when partner became pregnant           |
| 0.52832242 | S1 MAIN Any illnesses or problems during pregnancy      |
| 0.5165431  | eclampsia                                               |
| 0.51454371 | S1 MAIN Can run own life                                |
| 0.50289316 | S1 MAIN Type of accommodation                           |
| 0.50016814 | S1 MAIN Damp or condensation                            |
|            | S1 MAIN Respondent's Ethnic Group - 8 category          |
| 0.49808799 | classification                                          |
| 0.49618424 | S1 PART Number of cigarettes smoked per day before preg |
| 0.49427377 | preg_hyperemesis                                        |
| 0.49091902 | Dad not in household                                    |
| 0.45183659 | preg_UTI                                                |
| 0.44619761 | S1 MAIN Paid job when pregnant                          |

|            |                                                         |
|------------|---------------------------------------------------------|
| 0.43338718 | asthma                                                  |
| 0.43027782 | S1 MAIN Number of cigarettes smoked per day before preg |
| 0.42614891 | S1 DV Grandparent of CM in household                    |
| 0.42031301 | S1 PART Often gets in violent rage                      |
| 0.40715609 | S1 MAIN Ever smoked                                     |
| 0.40458956 | S1 HHQ Number of cohort babies                          |
| 0.4034741  | S1 MAIN Whether had fertility treatment                 |
| 0.39221972 | preg_non_trivial_infection                              |
| 0.38841104 | S1 MAIN Partner ever used force                         |
| 0.38469403 | depression                                              |
| 0.3733067  | S1 MAIN Reading ability - forms                         |
| 0.3667478  | S1 PART Health Conditions: Diabetes                     |
| 0.35096534 | preg_anaemia                                            |
| 0.34717177 | thyroid                                                 |
| 0.32529832 | S1 MAIN Numerical ability - change in shops             |
| 0.32252348 | hypertension                                            |
| 0.31739328 | dermatitis                                              |
| 0.30876654 | migraine                                                |
| 0.27980377 | diabetes_m                                              |
| 0.2777814  | arthritis                                               |
| 0.27613931 | epilepsy                                                |
| 0.27516667 | endometriosis                                           |
| 0.26443573 | Hearing_loss                                            |
| 0.25092891 | dorsopathies                                            |
| 0.24985899 | anaemia                                                 |
| 0.24714923 | xxx                                                     |
| 0.24388683 | irritable_bowel                                         |
| 0.21947669 | S1 MAIN Number of units in average day before pregnancy |
| 0.18820304 | psoriasis                                               |
| 0.17444372 | preg_sciatica                                           |
| 0          | S1 PART Frequency of alcohol consumption before preg    |

Best 10 algorithm average importance scores: 32 weeks

| overall  | id                                      |
|----------|-----------------------------------------|
| 0.910889 | S1 DV OECD equivalised income           |
| 0.853509 | Partners age at birth of CM             |
| 0.786788 | S1 MAIN SOC2000 (without dots)          |
| 0.785426 | S1 MAIN Date of Birth (year)            |
| 0.760617 | S1 PART Life satisfaction               |
| 0.757794 | S1 PART Happy/Unhappy with relationship |
| 0.746222 | S1 PART Control over life               |
| 0.743651 | S1 PART Highest academic qualification  |
| 0.736363 | age left ft education                   |
| 0.734127 | S1 PART Age left full-time education    |
| 0.722538 | S1 PART Longstanding illness            |
| 0.711836 | S1 PART Can run own life                |
| 0.705173 | S1 PART Partner ever used force         |

0.703344 S1 DV Number of siblings of CM in household  
 0.700166 S1 MAIN Vandalism and damage to property  
 0.697616 S1 PART General Health  
 0.696068 S1 MAIN Pollution, grime, environmental problems  
 0.683107 S1 MAIN Happy/Unhappy with relationship  
 0.6799 S1 MAIN Life satisfaction  
 0.675223 S1 PART Depression  
 0.672835 S1 MAIN Satisfaction with area  
 0.659699 preg\_bleeding  
 0.63767 S1 PART Often gets in violent rage  
 0.621317 S1 PART Paid job when partner became pregnant  
 0.609113 S1 PART Suspects on brink of separation  
 0.607723 S1 MAIN Control over life  
 0.593643 S1 MAIN Gets what wants out of life  
 S1 MAIN Respondent's Ethnic Group - 8 category  
 0.590723 classification  
 0.590004 S1 HHQ Cohort Member Sex C1  
 0.588831 S1 MAIN Can run own life  
 0.578404 S1 MAIN Depression  
 0.569869 depression  
 0.558067 S1 MAIN Suspects on brink of separation  
 0.551809 eclampsia  
 0.549857 preg\_UTI  
 0.539216 Dad not in household  
 0.533782 MC\_IBI\_1  
 0.531379 S1 MAIN Paid job when pregnant  
 0.524726 S1 MAIN Damp or condensation  
 0.517361 S1 DV Grandparent of CM in household  
 0.511897 S1 MAIN Type of accommodation  
 0.506997 asthma  
 0.481643 S1 MAIN Ever smoked  
 0.480417 preg\_non\_trivial\_infection  
 0.474636 S1 MAIN Reading ability - forms  
 0.469636 S1 MAIN Partner ever used force  
 0.46829 S1 MAIN Number of cigarettes smoked per day before preg  
 0.467215 S1 PART Number of cigarettes smoked per day before preg  
 0.455216 Hearing\_loss  
 0.44133 S1 MAIN Whether had fertility treatment  
 0.439995 S1 MAIN Any illnesses or problems during pregnancy  
 0.436649 irritable\_bowel  
 0.43472 S1 HHQ Number of cohort babies  
 0.433575 preg\_hyperemesis  
 0.425048 migraine  
 0.423814 S1 PART Health Conditions: Diabetes  
 0.415632 dorsopathies  
 0.393359 hypertension  
 0.374417 epilepsy  
 0.356019 thyroid

0.355177 S1 MAIN Numerical ability - change in shops  
0.313502 diabetes\_m  
0.2616 preg\_anaemia  
0.229257 dermatitis  
0.211516 S1 MAIN Number of units in average day before pregnancy  
0.189147 anaemia  
0.164934 arthritis  
0.143376 preg\_sciatica  
0.128683 psoriasis  
0.118696 endometriosis  
0.087268 xxx  
0 S1 PART Frequency of alcohol consumption before preg

### Supplementary file S2:

Hyper-tuning results graphs for selecting the number of variables at each split, Stata code including implementation of algorithms with original MCS variable names.

Hyper-tuning results graph for 32 weeks.

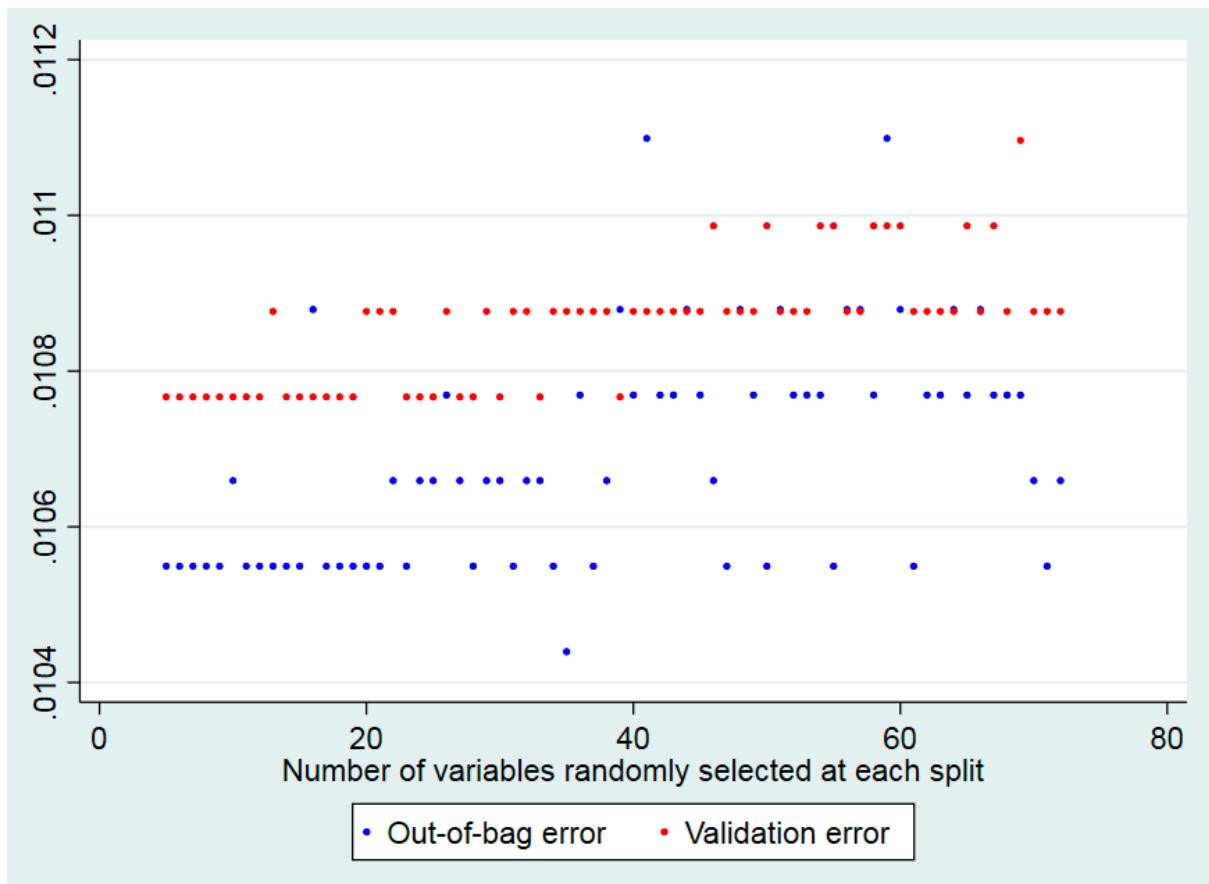

Hyper-tuning results graph for 37 weeks.

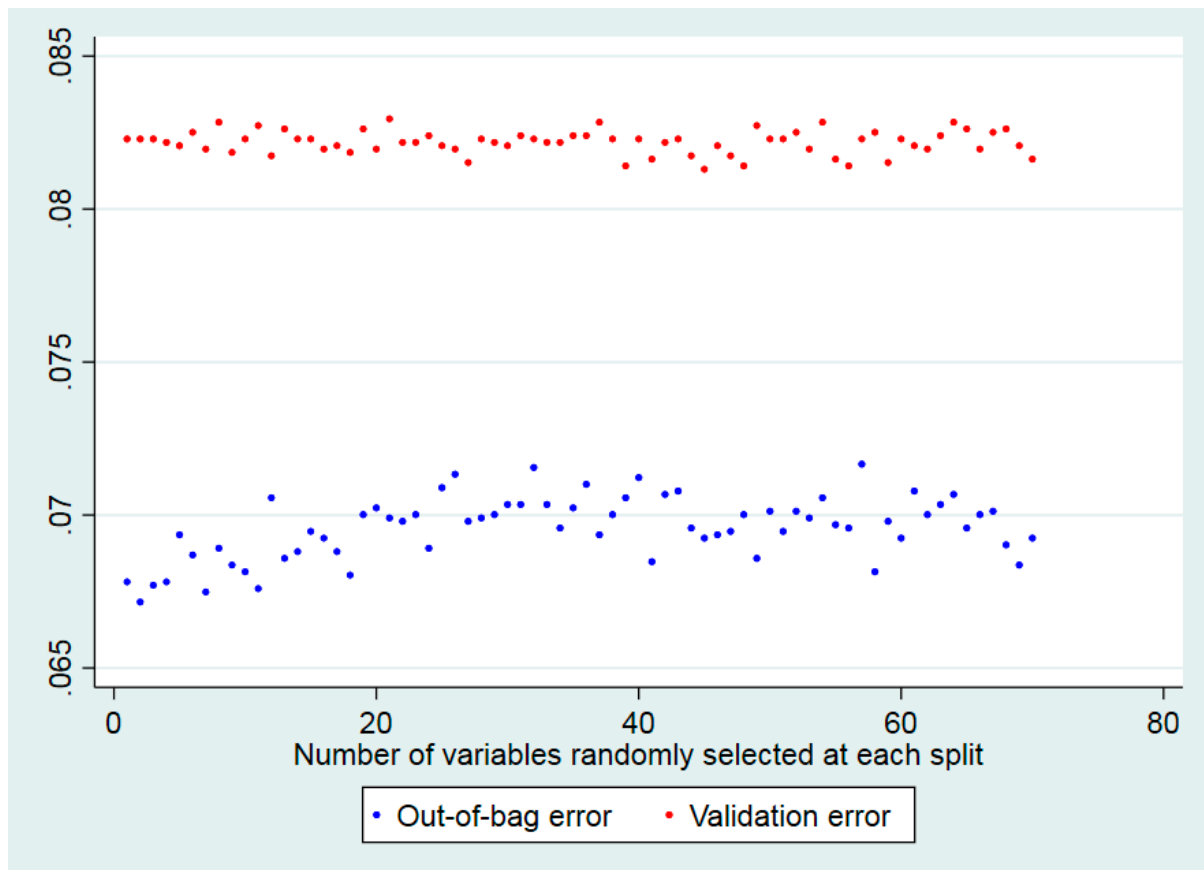

**Stata code (for one set of algorithms): producing importance scores.**

```
drop if missing(premie32)
```

```
//randomise the data
```

```
set seed 1
```

```
gen u = uniform()
```

```
sort u
```

```
rforest premie32 ADOEDE00 part_age ADOTHS00 ADGPAR00 age_left_ed dad_not_pres AMD08E00
MC_IBI_1 Mums_birth dorsopathies preg_sciatica preg_non_trivial_infection preg_anaemia
preg_UTI eclampsia preg_hyperemesis preg_bleeding endometriosis arthritis psoriasis dermatitis
irritable_bowel asthma hypertension Hearing_loss migraine epilepsy depression xxx diabetes_m
thyroid anaemia aplfte00 apacqu00 apwopr00 apwali00 apruli00 apcont00 apforc00 aphare00
apresn00 aprage00 apdrof00 apcipr00 apdean00 apdiab00 apegehe00 aploil00 amarvd00 amarpg00
amarea00 amdamp00 ammoty00 amresn00 amhare00 amforc00 ampuda00 amcipr00 amsmev00
amdean00 amfetr00 ahnoba00 ahcsexa0 ammath00 amform00 amsocc00 amwkpr00 amwali00
amruli00 amcont00 amwant00 amilpr00, type(class) iter(20) numvars(7)
```

```
ereturn list
```

```
predict pred
```

```
list ahcsexa0 amfetr00 in 1/5
```

```
matrix importance = e(importance)
```

```
svmat importance
```

```
list importance in 1/5
```

```
//note that next step will result in all obs being counted as missing
```

```
gen id = ""
```

```
local mynames : rownames importance
```

```
    local k : word count `mynames'
```

```
    // If there are more variables than observations
```

```
    if `k'>_N {
```

```
        set obs `k'
```

```
    }
```

```
    forvalues i = 1(1)`k' {
```

```
        local aword : word `i' of `mynames'
```

```
        local alabel : variable label `aword'
```

```
        if ("`alabel'"!="") qui replace id= "`alabel'" in `i'
```

```
        else qui replace id= "`aword'" in `i'
```

```
    }
```

```
graph hbar (mean) importance, over(id, sort(1)) bar(1, color(green)) bar(2,  
color(red)) ytitle(Importance) xsize(6) ysize(11)
```

### **Example of Stata code for number of cases correctly classified (37 weeks, 9 features)**

```
drop if missing(premie37)
```

```
set seed 1
```

```
gen u = uniform()
```

```
sort u
```

```
rforest premie37 ADOEDE00 part_age apwali00 Mums_birth amsocc00 aplfte00 apacqu00 aphare00
```

```
age_left_ed, type(class) iter(30)
```

```
ereturn list
```

```
predict p1
```

```
list p1 part_age in 1/5
```

```
ereturn list
```

### **Examples of hypertuning code.**

```
//hyperparameter tuning for optimal n iterations
```

```
drop if missing(premie_258)
```

```
set seed 201807
```

```
gen u=uniform()
```

```
sort u, stable
```

```
gen out_of_bag_error1 = .
```

```
gen validation_error = .
```

```
gen iter1 = .
```

```
local j = 0
```

```

forvalues i = 10(5)250 {
  local j = `j' + 1
  rforest premie_258 ADOEDE00 part_age apwali00 Mums_birth amsocc00 aplfte00 apacqu00
  aphare00 age_left_ed amwali00 apegehe00 amhare00 in 1/9100, type(class) iterations(`i') numvars(1)
  quietly replace iter1 = `i' in `j'
  quietly replace out_of_bag_error1 = `e(OOB_Error)' in `j'
  predict p in 9100/18201
  replace validation_error = `e(error_rate)' in `j'
  drop p
}
label variable out_of_bag_error1 "Out-of-bag error"
label variable iter1 "Iterations"
label variable validation_error "Validation error"
scatter out_of_bag_error1 iter1, mcolor(blue) msize(tiny) ||
scatter validation_error iter1, mcolor(red) msize(tiny)

///hyperparameter tuning for n vars at each split
generate oob_error = .
generate nvars = .
generate val_error = .
local j = 0
forvalues i = 1(1)9 {
  local j = `j' + 1
  rforest premie_258 ADOEDE00 part_age apwali00 Mums_birth amsocc00 aplfte00 apacqu00
  aphare00 age_left_ed in 1/9100, type(class) iter(30) numvars(`i')
  quietly replace nvars = `i' in `j'
  quietly replace oob_error = `e(OOB_Error)' in `j'
  predict p in 9100/18201
  quietly replace val_error = `e(error_rate)' in `j'
  drop p
}
label variable oob_error "Out-of-bag error"
label variable val_error "Validation error"
label variable nvars "Number of variables randomly selected at each split"
scatter oob_error nvars, mcolor(blue) msize(tiny) || scatter val_error nvars, mcolor(red) msize(tiny)

frame put val_error nvars, into(development)
frame development {
  sort val_error, stable
  local min_val_err = val_error[1]
  local min_nvars = nvars[1]
}
display "Minimum Error: `min_val_err'; Corresponding number of variables `min_nvars'"
frame drop development

```
